# Supplementary material for: Adipose tissue area as a predictor for the efficacy of apatinib in platinum-resistant ovarian cancer: an exploratory imaging biomarker analysis of the AEROC trial
Source: PubMed Central journal article supplement (PMC7534164; doi:10.1186/s12916-020-01733-4), 2020-10-05
Supplement: 12916_2020_1733_MOESM5_ESM.pdf [file 12916_2020_1733_MOESM5_ESM.pdf]

### Minimum $P$ value approach

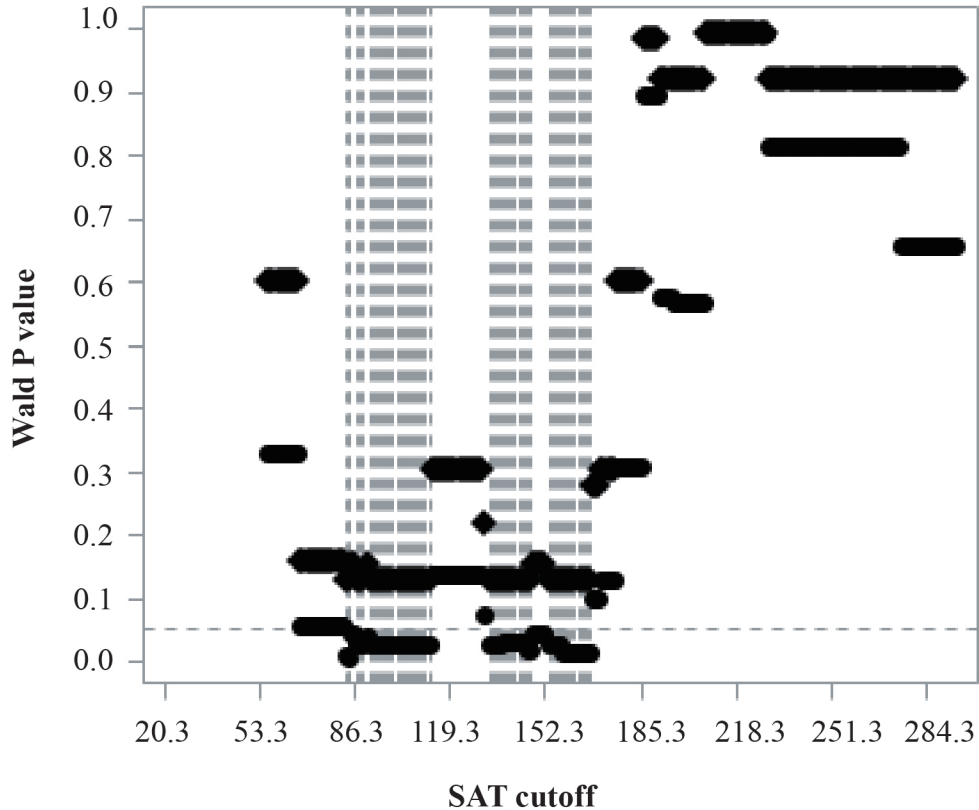

● Wald  $P$  value

◆ False discovery rate  $P$  value

| Cutoff | Cox model Wald $P$ value |                 | False discovery rate |                 |
|--------|--------------------------|-----------------|----------------------|-----------------|
|        | $P$ value                | Selected cutoff | $P$ value            | Selected cutoff |
| 129.28 | 0.028                    | ←===            | 0.128                | ←===            |
